1 ***Dnmt1* has an essential function despite the absence of CpG DNA methylation in the red flour beetle**

2 ***Tribolium castaneum***

3

4 Nora KE Schulz<sup>1</sup>, C Isabel Wagner<sup>1</sup>, Julia Ebeling<sup>1</sup>, Günter Raddatz<sup>2</sup>, Maike F Diddens-de Buhr<sup>1</sup>, Frank  
5 Lyko<sup>2</sup>, Joachim Kurtz<sup>1,\*</sup>

6

7 <sup>1</sup>Institute for Evolution and Biodiversity

8 University of Münster

9 Hüfferstr. 1

10 48149 Münster

11 Germany

12 <sup>2</sup>Division of Epigenetics

13 DKFZ-ZMBH Alliance

14 German Cancer Research Center (DKFZ)

15 Im Neuenheimer Feld 580

16 69120 Heidelberg

17 Germany

18 \*Correspondence

19 Joachim Kurtz,

20 Institute for Evolution and Biodiversity

21 University of Münster

22 Münster, Germany.

23 Email: [joachim.kurtz@uni-muenster.de](mailto:joachim.kurtz@uni-muenster.de)

24 Abstract

25 Epigenetic mechanisms, such as CpG DNA methylation enable phenotypic plasticity and rapid  
26 adaptation to changing environments. CpG DNA methylation is established by DNA methyltransferases  
27 (DNMTs), which are well conserved across vertebrates and invertebrates. There are insects with  
28 functional DNA methylation despite lacking a complete set of *Dnmts*. But at least one of the enzymes,  
29 DNMT1, appears to be required to maintain an active DNA methylation system. The red flour beetle,  
30 *Tribolium castaneum*, lacks *Dnmt3* but possesses *Dnmt1* and it has been controversial whether it has  
31 a functional DNA methylation system.

32 Using whole genome bisulfite sequencing, we did not find any defined patterns of CpG DNA  
33 methylation in embryos. Nevertheless, we found *Dnmt1* expressed throughout the entire life cycle of  
34 the beetle, with mRNA transcripts significantly more abundant in eggs and ovaries. A maternal  
35 knockdown of *Dnmt1* caused a developmental arrest in offspring embryos.

36 We show that *Dnmt1* plays an essential role in *T. castaneum* embryos and that its downregulation  
37 leads to an early developmental arrest. This function appears to be unrelated to DNA methylation,  
38 since we did not find any evidence for this modification. This strongly suggests an alternative role of  
39 this protein.

40

41 1 Introduction

42 Phenotypic plasticity is enabled by epigenetic mechanisms, which help the organism to adapt rapidly  
43 to changing environmental conditions without affecting the underlying genotype <sup>1</sup>. One of these  
44 mechanisms is DNA methylation, which in insects is associated with a wide variety of phenotypically  
45 plastic traits <sup>2,3</sup>. In eusocial insects, caste formation can correlate with differential DNA methylation  
46 patterns <sup>4-6</sup>. One of the first examples for functional DNA methylation in insects was the discovery that  
47 the downregulation of the methylation machinery in honey bee larvae caused them to develop into a  
48 queen-like phenotype, which is naturally established by the feeding on royal jelly <sup>7</sup>. Furthermore, DNA  
49 methylation patterns do not only differ between the brains of queens and workers <sup>5</sup>, but also within  
50 the worker caste, where they have been associated with different tasks performed by the worker bee  
51 <sup>8</sup>. Additionally, these epigenetic marks appear to be reversible if the individual has to switch its task <sup>9</sup>.  
52 Furthermore, in two ant species the same set of genes was differentially methylated according to  
53 developmental stage and caste <sup>6</sup>. DNA methylation can also be observed in non-social insects and may  
54 contribute to the striking phase polyphenism between solitary and gregariously living migratory locusts  
55 <sup>10,11</sup>. On the other hand, it also has been suggested that DNA methylation can have a more general,  
56 basic role in insects and it might function in more ubiquitously essential processes, e.g. embryonic  
57 development, genomic imprinting and alternative splicing <sup>6,12-15</sup>.  
58 Insect methylation patterns can be highly diverse <sup>15,16</sup>. In cockroaches and some lepidopterans, DNA  
59 methylation can reach levels similar to those observed in vertebrates and plants <sup>15,17</sup>. This is also true  
60 for some regions of the genome of the stick insect, but here in addition to gene bodies also repetitive  
61 elements are strongly methylated <sup>18</sup>. In contrast, holometabolous insects possess sparser DNA  
62 methylation than vertebrates <sup>15,16,19</sup>. Most of these insects also differ from mammals in the location of  
63 their methylation marks, as the majority of CpG methylation occurs within gene bodies <sup>6,20,21</sup>. The  
64 placement of methyl groups at these mostly intragenic loci could hint at its possible role in alternative  
65 splicing <sup>22</sup>.

66 In invertebrates and vertebrates alike, the same conserved set of enzymes adds methyl groups to  
67 cytosines followed by a guanine (CpG)<sup>23</sup>. The resulting CpG DNA methylation patterns are therefore  
68 symmetrical on both strands of the DNA. In most cases, two DNA methyltransferases (DNMTs) are  
69 needed to sustain functional CpG DNA methylation. DNA methyltransferase 1 (DNMT1) is responsible  
70 for maintaining pre-existing methylation patterns by methylating hemimethylated DNA after  
71 replication, while DNA methyltransferase 3 (DNMT3) establishes new methylation patterns on  
72 previously unmethylated cytosines<sup>23</sup>. Previously, it was thought that a third enzyme, DNMT2, was also  
73 involved in DNA methylation because of sequence conservation and the fact that it also contains a  
74 cytosine methylase domain<sup>24</sup>. However, several studies have shown that this enzyme methylates small  
75 RNAs, especially tRNA<sup>24,25</sup>. Furthermore, organisms that lack *Dnmt1* and 3, but contain *Dnmt2* do not  
76 possess a functional DNA methylation system<sup>24,26,27</sup>.

77 The distribution of *Dnmts* in insects is quite diverse. While many insects, especially eusocial species,  
78 have a complete set of *Dnmts*, some with an expansion in copies for *Dnmt1*, other insects completely  
79 or partially lack *Dnmts* and some also fail to produce functional levels of DNA methylation<sup>15,19,28</sup>.  
80 Diptera appear to have lost both *Dnmt1* and *Dnmt3* and with it any relevant CpG DNA methylation<sup>15,16</sup>.  
81 Some insect species including examples from Coleoptera, Hemiptera, Lepidoptera and even social  
82 Hymenoptera are lacking a gene encoding for DNMT3<sup>15,29–31</sup>. Nevertheless, several of them may show  
83 levels of DNA methylation, which presented either directly in sequencing studies or were deduced  
84 from the CpG depletion in their genomes<sup>15,16,30</sup>. Thus, the question arises, how a functional DNA  
85 methylation system can be sustained in the absence of an enzyme able of *de novo* methylation. It has  
86 been suggested that DNMT1 could take over this function, but to the best of our knowledge there are  
87 no studies demonstrating this.

88 The status of a functional DNA methylation system in the red flour beetle *Tribolium castaneum* has  
89 been controversially discussed over the past years. Over evolutionary time, the mutagenic effect of a  
90 methyl group attached to a cytosine leads to a depletion of CpGs from the genome<sup>32</sup>. However, the  
91 beetles' genes do not exhibit the bimodal distribution of normalized CpG content associated with the

92 presence of DNA methylation in other insects<sup>4,15</sup>. Additionally, in adult beetles, low-coverage whole-  
93 genome bisulfite sequencing (WGBS), which reveals methylation at single-base resolution, could not  
94 detect any defined patterns of CpG DNA methylation<sup>19</sup>. On the other hand, using an approach based  
95 on methylation sensitive restriction endonucleases, which lacks the sensitivity and specificity of WGBS,  
96 Feliciello *et al.* (2013) found evidence for DNA methylation in early embryos, whereas larvae, pupae  
97 and adults were found to be mostly devoid of methylation. While this raised the possibility of an active  
98 demethylation process in later developmental stages, resembling the epigenetic reprogramming in  
99 mammalian embryos<sup>34,35</sup>, additional bisulfite sequencing of satellite DNA indicated that these  
100 fragments remain heavily methylated throughout the entire lifetime of the individual, even in non-CpG  
101 contexts<sup>33</sup>. Furthermore, another study based on bisulfite sequencing also found DNA methylation  
102 outside the context of CpG and mostly at CpA<sup>36</sup>.

103 The controversial evidence of CpG DNA methylation in *T. castaneum* demands for additional,  
104 functional studies in this important insect model organism. In *T. castaneum* we observe phenotypic  
105 plasticity in the form of immune priming, *i.e.* a more successful response to a pathogen at a secondary  
106 exposure<sup>37</sup>. This immune priming can be maternally and paternally transferred to the offspring<sup>38-40</sup>,  
107 which makes the involvement of epigenetic modifications in this phenomenon likely. Besides other  
108 epigenetic mechanisms, DNA methylation and its facilitating enzymes have been indicated to play a  
109 role in the evolution of resistance and the rapid adaption we see during host-parasite co-evolution  
110<sup>41,42</sup>. Therefore, we here investigate the existence of CpG DNA methylation and the role of *Dnmt1* in  
111 *T. castaneum* using WGBS and knockdown of *Dnmt1* using maternal RNAi.

## 112 2 Results

### 113 2.1 WGBS confirms the absence of CpG methylation in *Tribolium* eggs

114 To detect CpG DNA methylation at single base resolution, we performed WGBS on two replicates of  
115 pooled eggs, which gave us a six-fold coverage of the entire genome. The conversion rate of cytosines  
116 to uracil by the bisulfite treatment was 99.59 % and 99.58 % for the mapped reads for replicate one  
117 and two, respectively. For sites containing at least one unconverted cytosine the mean level of non-

118 conversion was 0.3 %. Only 1038 partially unconverted CpGs occurred at the same site in both  
119 replicates. Overall 0.1 % of the cytosines at these sites were unconverted. Only 84 (8.1 %) of the sites  
120 with unconverted cytosines that were observed in both replicates mapped on a chromosome, while  
121 the rest was derived from unmapped regions. We also observed a highly significantly negative  
122 correlation between the fold coverage and the proportion of unconverted cytosines observed at the  
123 same CpG site ( $\rho=-0.925$ ,  $n=1038$ ,  $p<0.001$ , Figure 1). This implies that the cytosines that remain  
124 after the bisulfite treatment can be either attributed to incomplete conversion or sequencing errors  
125 and therefore no CpG DNA methylation is present in the embryos.

## 126 2.2 Expression of *Dnmt1*

127 To investigate the expression of *Dnmt1* across the entire life cycle of the beetle we analysed samples  
128 of eggs, larvae, pupae and adults via RT qPCR. We used equal numbers of male and female adults and  
129 pupae, while sex was not determined for eggs and larvae. All samples examined during this study  
130 contained measurable amounts of *Dnmt1* mRNA. The expression of *Dnmt1* was significantly higher in  
131 the eggs compared to whole body samples from adult beetles (*Table 1*). In larvae and pupae, we found  
132 *Dnmt1* to be expressed at similar levels as in the adult samples (*Table 1*). This suggested that *Dnmt1*  
133 might have a function throughout the whole life of the beetle.

134 We dissected virgin beetles of both sexes to investigate the expression of *Dnmt1* in the gonads. Any  
135 involvement in transgenerational processes would probably require the expression of the gene in the  
136 reproductive tissues so that mRNAs could be passed on to the offspring. In the female samples *Dnmt1*  
137 was significantly upregulated in the ovaries, while there was no significant difference in the expression  
138 of *Dnmt1* between the testes and whole-body samples in the males (*Table 1*).

## 139 2.3 Knockdown via maternal RNAi affects development and fecundity

140 To investigate possible functions of *Dnmt1* a knockdown via maternal RNAi was established. Firstly, we  
141 confirmed that the injection of *Dnmt1* dsRNA into female pupae led to a significant down-regulation  
142 in comparison to RNAi control injections, as measured by RT qPCR in the adult beetles. The treatment

143 with *Dnmt1* dsRNA significantly reduced the expression of the target gene compared to the RNAi  
144 control, while expression did not differ significantly between the untreated and RNAi control (Table 1).  
145 The knockdown was also transferred to the offspring, as the eggs of treated mothers showed  
146 significantly reduced amounts of *Dnmt1* dsRNA compared to eggs from the RNAi control (Table 1).  
147 Furthermore, *Dnmt1* knockdown significantly reduced the eclosion rate from pupae to imago (GLMM  
148 with binomial data distribution,  $df=2$ ,  $X^2=146.2$ ,  $p<0.001$ ), suggesting that the protein plays a role in  
149 metamorphosis. Following *Dnmt1* knockdown, the eclosion rate three days post injection was 80 %,  
150 which was significantly lower than for the RNAi control (90 %) (Tukey's HSD:  $z=6.93$ ,  $p<0.001$ ; Figure  
151 2a). The naïve control achieved 96 % survival, which is significantly better than the RNAi control  
152 (Tukey's HSD:  $z=-4.74$ ,  $p<0.001$ ; Figure 2a). This can be explained by the absence of injection wounds  
153 in these animals.

154 We determined the fecundity of the treated beetles, by calculating hatching rates for one hundred  
155 eggs per treatment and experimental replicate. This showed that the fitness of the females, which had  
156 received the *Dnmt1* knockdown treatment was severely affected, as the hatching rate of their offspring  
157 was significantly reduced and only 13 % of larvae hatched, compared to 69 % in both controls (GLMM  
158 with binomial data distribution,  $df=2$ ,  $X^2=274.46$ ,  $p<0.001$ ; Tukey HSD: *Dnmt1* – RNAi control  $z=12.7$ ,  
159  $p<0.001$ , *Dnmt1* – naïve  $z=12.8$ ,  $p<0.001$ , Figure 2b).

160 To confirm that the observed reduced fecundity was produced by the knockdown of *Dnmt1* and not  
161 any potential off-target effect on a different gene, we used a second non-overlapping construct. This  
162 construct also caused a significant downregulation in adults (Table 1) and significantly reduced female  
163 fecundity (Kruskal-Wallis  $df=3$ ,  $X^2=40.7$ ,  $p<0.001$ , Figure 2c) compared to the naïve (Construct a:  
164  $W=731.5$ ,  $p<0.001$ , Construct b:  $W=675.5$ ,  $p=0.001$ ) and RNAi control (Construct a:  $W=553.5$ ,  $p<0.001$ ,  
165 Construct b:  $W=470$ ,  $p=0.03$ ). The two controls did not differ significantly from each other ( $W=301$ ,  
166  $p=0.44$ ).

167 Additionally, we also investigated the effect of *Dnmt1* expression on male fertility. A knockdown in  
168 male pupae significantly reduced *Dnmt1* expression in the adults (Table 1) but did not reduce their

169 fertility over the first nine days of mating compared to the RNAi control or naïve group (GLMM with  
170 negative binomial data distribution,  $df=2$ ,  $\chi^2=2.3441$ ,  $p\text{-value}=0.31$ ).

#### 171 2.4 *Dnmt1* knockdown disrupts embryonic development

172 We also performed a closer analysis of embryos after maternal knockdown of *Dnmt1*. After twelve  
173 days, hardly any larvae had hatched, and we therefore assumed that the eggs had either not been  
174 fertilised or that the knockdown was causing an embryonic developmental arrest, which was  
175 previously observed in *Nasonia vitripennis*<sup>13</sup>. In order to identify the time point of a potential  
176 developmental arrest, we sampled eggs every two hours for the first ten hours after oviposition.  
177 According to their developmental status, the eggs were then assigned to one of four categories of a  
178 timeline of normal embryonic development. At the two first time points, we did not observe any  
179 significant developmental differences between the treatment groups (age 0-2 h: OLM<sub>2, 96</sub>,  $\chi^2=0.84$ ,  
180  $p=n.s.$ ; age 2-4 h: OLM<sub>2, 140</sub>,  $\chi^2=4.65$ ,  $p=0.098$ ). But, when the embryos were between four and six  
181 hours old, more than 60 % of the eggs of the knockdown treatment fell within the earliest category of  
182 development and therefore differ significantly from the two controls (OLM<sub>107</sub>,  $\chi^2=35.71$ ,  $p<0.001$ ). We  
183 observed a similar pattern at the embryonic ages of six to eight hours (OLM<sub>105</sub>,  $\chi^2=55.11$ ,  $p<0.001$ ) and  
184 eight to ten hours (OLM<sub>144</sub>,  $\chi^2=40.76$ ,  $p<0.001$ ). We therefore conclude that the knockdown of *Dnmt1*  
185 causes an early embryonic arrest after first few cleavage cycles (Figure 3).

### 186 3 Discussion

187 Using WGBS, we did not observe any recognizable evidence for CpG DNA methylation in *T. castaneum*  
188 embryos. The few candidate methylation marks detected by whole genome sequencing are most likely  
189 due to incomplete bisulfite conversion or sequencing errors. Furthermore, there is hardly any overlap  
190 in the candidate mCpGs between the two replicates, which leads us to conclude that CpG DNA  
191 methylation is absent in two-day old embryos. Our results agree with those of Zemach *et al.*, who were  
192 also unable to detect any significant levels of CpG DNA methylation in *T. castaneum*<sup>19</sup>. Yet, two other  
193 studies found DNA methylation in all life stages of the beetle. While Song *et al.* (2017) observed a



194 strong preference for CpA methylation, which because of its asymmetrical nature is very unlikely to be  
195 produced by DNMT1, Feliciello *et al.* (2013) found CpG methylation especially on satellite DNA but also  
196 spread across the genome of embryos. These differences might be explained by changing methylation  
197 patterns during different life stages and possible rapid dynamic changes during embryonic  
198 development similar to the epigenetic reprogramming in mammals<sup>34</sup>. Alternatively, they might also  
199 result from incomplete bisulfite deamination, which is often linked to the artefactual detection of  
200 methylation outside of the canonical CpG context.

201 *T. castaneum*, as several other insect species, lacks *Dnmt3* in its genome and therefore does not  
202 possess a complete DNA methylation system<sup>3,29,43</sup>. Nevertheless, some insect species lacking a  
203 complete set of *Dnmts*, show detectable DNA methylation including diverse methylation patterns in  
204 correlation with environmental changes<sup>15,16,44</sup>. It is still unknown whether *Dnmt1* can take over the  
205 function of the missing *Dnmt3* or if other enzymes are responsible for preserving the function.  
206 However, the lack of CpG methylation observed in the present study is further supported by the  
207 absence of CpG depletion from the beetle's gene set, which is a known evolutionary signal of CpG  
208 methylation<sup>32,45</sup>. To ultimately resolve this controversy, further studies are needed to determine  
209 whether, where and at which time functional levels of CpG DNA methylation might occur in  
210 *T. castaneum*.

211 Our results also show that *Dnmt1* is present and expressed in *T. castaneum* during all life stages, in  
212 both sexes and in the reproductive tissues despite the apparent absence of CpG DNA methylation. The  
213 expression of *Dnmt1* during the entire life cycle of the beetle hints at a possible function during several  
214 life stages. Because ovaries and eggs showed significantly higher relative amounts of *Dnmt1* mRNA,  
215 the protein might be especially relevant during reproduction and embryonic development.

216 Both constructs of *Dnmt1* used in our RNAi experiment significantly reduced the levels of *Dnmt1*  
217 mRNA. Although the reduction was only to 70% compared to the levels observed in the treatment  
218 control, it still produced a strong phenotype in its effect on offspring embryonic development. RNAi  
219 treatment in *B. mori* leads to a similar degree of reduction of *Dnmt1* and also decreased hatchability

220 <sup>44</sup>. A recently described alternatively spliced isoform of *Dnmt1* in *T. castaneum* lacks the C-terminal  
221 DNA methylase domain and is thus unable to methylate DNA, but was shown to be predominantly  
222 expressed <sup>36</sup>. While the dsRNA constructs used here should cause a knockdown of both isoforms, our  
223 gene expression analysis was only able to detect the transcript containing the methylase domain. Thus,  
224 the RNAi treatment might affect the predominant shorter isoform to a greater extent.

225 We could show that *Dnmt1* is essential for early embryonic development even in the absence of  
226 functional levels of CpG DNA methylation. The knockdown in mothers leads to high lethality in the  
227 offspring embryos within the first hours after oviposition. Similarly, the maternal knockdown of one  
228 copy of *Dnmt1* in *N. vitripennis* also lead to a developmental arrest in the embryos but at a later time  
229 point <sup>13</sup>. Additionally, fecundity in brown planthoppers was strongly decreased after *Dnmt1*  
230 knockdown <sup>46</sup>. DNMT1 appears to also have an essential role in metamorphosis of *T. castaneum* as a  
231 reduction during the pupal stage decreased the rate of eclosion. It is therefore reasonable to assume  
232 that DNMT1 has additional functions in *T. castaneum* and maybe also in other insects, including those  
233 possessing a DNA methylation machinery.

234 Alternative, non-catalytic functions of *Dnmt1* have been suggested <sup>47</sup>. The DNA-binding function could  
235 be intact in the absence of methylase domain, still enabling the enzyme to fulfil other tasks <sup>36</sup>. This is  
236 supported by the presence of a large N-terminal domain without methylase function but with many  
237 molecular binding patterns <sup>47</sup>. For example, specific motifs of the N-terminal domain have been shown  
238 to regulate the transcription of E-cadherin in humans without the association with any changes in  
239 methylation patterns <sup>48</sup>. Further studies in vertebrates indicate that DNMT1 binding to histone  
240 modification enzymes is involved in modulation of gene expression <sup>49,50</sup>. Additional support comes  
241 from the clawed frog *Xenopus laevis*, for which *Dnmt1* expression is also essential during embryonic  
242 development <sup>51</sup>. Here, the protein silences genes by directly repressing transcription independent of  
243 its catalytic function <sup>52</sup>. The downregulation of *Dnmt1* leads to the premature activation of gene  
244 expression before the mid-blastula transition without any larger changes in methylation patterns <sup>52</sup>.  
245 This may indicate that also in insects including *T. castaneum* the sufficient provision of maternal *Dnmt1*

246 transcripts ensures the correct timing of the maternal to zygotic transition of mRNA transcription and  
247 thereby prevents embryonic developmental arrest and death. The results of this study emphasise a  
248 presumably non-catalytic but essential role of *Dnmt1*, which needs to be investigated in more detail.

## 249 4 Methods

### 250 4.1 Model organism

251 We used beetles from the Georgia 2 (GA-2) line for WGBS, since the genome sequence of *T. castaneum*  
252 was produced from that line<sup>29</sup>. Expression analysis and knockdown experiments were carried out with  
253 individuals from the San Bernadino (SB) line originating in the Sokoloff laboratory (Tribolium Stock  
254 Center, California State University, San Bernardino, USA). Beetles were kept on organic wheat flour  
255 (type 550) with 5 % brewer's yeast at a population size of more than 200 individuals. They were  
256 maintained at 30 °C and 70 % humidity at a 12h-light/12h-dark cycle.

### 257 4.2 Whole genome bisulfite sequencing

258 WGBS was performed on two replicates each from 300-400 µl of eggs. We collected eggs after a 24  
259 hours oviposition period from a population of about 1000 individuals of the GA-2 strain. Samples were  
260 incubated at 30 °C with 70 % humidity for an additional 24 h, then frozen in liquid nitrogen, and stored  
261 at -80 °C.

262 Per sample 5 µg of high molecular weight DNA were used for fragmentation using the Covaris S2 AFA  
263 System in a total volume of 100 µl. The fragmentation (parameters: duty cycle: 10 %; intensity: 5;  
264 cycles/burst: 200; cycles: 3) was run for a total fragmentation time of 180 s. Fragmentation was  
265 confirmed with a 2100 Bioanalyzer (Agilent Technologies) using a DNA1000 chip. The fragmented DNAs  
266 were concentrated to a final volume of 75 µl using a DNA Speed Vac. End repair of fragmented DNA  
267 was carried out in a total volume of 100 µl using the Paired End DNA Sample Prep Kit (Illumina) as  
268 recommended by the manufacturer. For the ligation of the adaptors, the Illumina Early Access  
269 Methylation Adaptor Oligo Kit and the Paired End DNA Sample Prep Kit (Illumina) were used, as

270 recommended by the manufacturer. For the size selection of the adaptor-ligated fragments, we used  
271 the E-Gel Electrophoresis System (Invitrogen) and a Size Select 2 % precast agarose gel (Invitrogen).  
272 Each fragmented DNA was loaded on two lanes of the E-gel. Electrophoresis was carried out using the  
273 “Size Select” program for 16 min. According to the standard loaded (50 bp DNA Ladder, Invitrogen),  
274 240 bp fragments were extracted from the gel, pooled, and directly transferred to bisulfite treatment  
275 without further purification. For the bisulfite treatment we used the EZ-DNA Methylation Kit (Zymo)  
276 as recommended by the manufacturer with the exception of a modified thermal profile for the bisulfite  
277 conversion reaction. The conversion was carried out in a thermal cycler using the following thermal  
278 profile: 95 °C for 15 s, 50 °C for 1 h, both steps repeated 15 times, 4 °C for at least 10 min. The libraries  
279 were subsequently amplified, using the Fast Start High Fidelity PCR System (Roche) with buffer 2, and  
280 PE1.1 and PE2.1 amplification primers (Illumina). PCR thermal profile: 95 °C for 2 min, 95 °C for 30 s,  
281 65 °C for 20 s, 72 °C for 30 s, then repeat from step 2, 11×, 72 °C for 7 min, hold at 4 °C. PCR reactions  
282 were purified on PCR purification columns (MinElute, Qiagen) and eluted in 20 µl elution buffer  
283 (Qiagen).

284 Paired-end sequencing was performed on an Illumina HiSeq 2000 system with read lengths of 105 bp  
285 and an average insert size of 240 bp. Reads were trimmed and mapped with BSMAP 2.5<sup>53</sup> using the  
286 assembly version 3.0 of the *T. castaneum* genome (<https://www.hgsc.bcm.edu>) as a reference  
287 sequence. Duplicates were removed using the Picard tool (<http://broadinstitute.github.io/picard>).  
288 Methylation ratios were determined using a Python script (methratio.py) distributed together with the  
289 BSMAP package.

290 For every site containing a CpG, we calculated the fold coverage and the proportion of cytosines at  
291 each site that had not been converted by the bisulfite treatment. We also computed which cytosines  
292 that were partially unconverted occurred in both replicates and combined this data. Finally, we  
293 checked whether there is a correlation between proportion of unconverted cytosines and fold  
294 coverage.

### 295 4.3 Gene Expression Analysis

296 We measured the expression of *Dnmt1* in different life history stages (eggs, larvae, pupae, adults) as  
297 well as in the reproductive organs of the beetle using quantitative real-time PCR (RT qPCR). At the time  
298 point of collection, around 200 µl of eggs were used per sample, while for all other samples material  
299 from five individuals was pooled, immediately shock frozen in liquid nitrogen and stored at -80 °C. We  
300 analysed four replicates for each life history stage as well as for the gonad and whole-body samples.

301 The applied RNA extraction protocol combines phenol/chloroform lysis and extraction with the  
302 purification via spin columns from the SV Total RNA Isolation System (Promega) and was performed as  
303 described in Eggert et al. (2014). We performed reverse transcription into complementary DNA (cDNA)  
304 with the RNA-dependent DNA polymerase SuperScript III and the use of oligo(dT)<sub>18</sub> primers  
305 (Invitrogen). The reaction started with 100 ng RNA and produced a final volume of 10 µl. The samples  
306 were stored at 4 °C for up to one week. For all samples, we measured the expression of *Dnmt1* relative  
307 to the expression of two housekeeping genes the *ribosomal protein L13a* (*RpL13a*) and *ribosomal*  
308 *protein 49* (*rp49*). All primers were designed to cross exon-intron boundaries and their quantification  
309 efficiency (E) was calculated using a serial dilution curve (Supplementary Table S1).

310 We applied qPCR using the LightCycler® 480 Real-Time PCR System (Roche) and KAPA SYBR® FAST qPCR  
311 Light Cyler 480 reaction mix (PEQLAB). Prior to the run of the assay, we diluted the cDNA 1:10. All  
312 experiments were carried out with two technical replicates per sample. Crossing points (Cp) for each  
313 technical replicate were calculated and used in further analysis if the standard deviation (STD) between  
314 the two technical replicates was below 0.5.

### 315 4.4 Knockdown via parental RNAi

316 To accomplish a knockdown of *Dnmt1* via parental RNAi, we designed a construct for double stranded  
317 RNA (dsRNA). DsRNA complimentary to the *Asparagin synthetase A* gene (*AsnA*) from *Escherichia*  
318 *coli* served as a treatment control<sup>55</sup>. We produced both dsRNA constructs using EcoRV digested  
319 pZErO™-2 vector (Invitrogen) and *in vitro* transcribed into dsRNA with the T7 RNA polymerase

320 based T7 MEGAscript Kit (Ambion). iBeetle-Base provided us with the sequence for the second non-  
321 overlapping construct, which we used in order to be able to exclude possible off-target effects  
322 (Schmitt-Engel et al. 2015, [http://ibeetle-base.uni-goettingen.de/details/iB\\_08496](http://ibeetle-base.uni-goettingen.de/details/iB_08496)). For this we  
323 obtained the dsRNA from EupheriaBiotech.

324 For the RNAi procedure, we treated female and male pupae with either *Dnmt1* dsRNA, *AsnA* dsRNA or  
325 left them naïve, *i.e.* untreated. For the injections, we adjusted the concentration of dsRNA to  
326 1,800 ng/ $\mu$ l. Prior to the injections, three-day old pupae were collected and glued with the end of their  
327 abdomen to microscopic slides with Fixogum (Marabu). The injections were carried out with a nano  
328 injector (FemtoJet, Eppendorf) using borosilicate glass capillaries (100 mm length, 1.0 mm outside  
329 diameter, 0.021 mm wall thickness; Hilgenberg). Pupae were injected with the dsRNA solution laterally  
330 between the second and third segment of the abdomen. We stopped the injections when the pupae  
331 stretched, due to the increasing turgor.

332 The pupae were left on the glass slides in Petri dishes until they eclosed one to five days later. After  
333 eclosion individual survival was recorded and the surviving beetles could mature for four days. At this  
334 point, we randomly sampled individuals for either expression analysis or mating and egg production.  
335 Due to large sample sizes required in the experiment involving embryo staining, we conducted these  
336 injections in three consecutive experimental blocks. We confirmed the success of the knockdown by  
337 performing expression analysis on four pools of three to five individuals per treatment and block.  
338 Additionally, we measured the *Dnmt1* mRNA amount present in the eggs, by performing RT qPCR on  
339 one pool of 150-200  $\mu$ l eggs per each of the three experimental blocks and treatment groups. At the  
340 time point of RNA extraction eggs of each sample were between 45 minutes and 16 hours old.

#### 341 4.5 Fitness costs of the knockdown

342 To estimate potential fitness costs of the *Dnmt1* knockdown treatment we collected one hundred eggs  
343 from each of the treatment groups and controls, individualised them and counted live larvae twelve  
344 days later. For the second non-overlapping dsRNA construct (construct b) fitness costs were examined

345 in a different way. The construct from the previous experiment (construct a) was also used here. We  
346 set up single mating pairs (n=23-30) and let them mate for 24 hours. Then live larvae were counted  
347 twelve days later for each pair. Besides the two dsRNA constructs, a RNAi control and a naïve group  
348 were included.

349 To measure the fertility of the males after RNAi treatment, individual mating pairs with untreated,  
350 virgin females of the same age were formed four days post eclosion. The pairs were put on to new  
351 flour after 24 hours and then again, every three days for the next nine days. Two weeks after the  
352 oviposition living larvae were counted for each pair (n=20-26).

#### 353 4.6 Embryonic development after maternal knockdown

354 To determine a possible effect of the maternal knockdown on their offspring, we observed the  
355 embryonic development via DNA staining. For this we collected eggs every two hours over a period of  
356 ten hours, which enabled us to look at five individual time points after oviposition. For the fixation, we  
357 washed the eggs with water and treated them with 25 % DanKlorix (Colgate –Palmolive), which  
358 contains 5% sodium hypochlorite to remove the chorion. The eggs were submerged in heptane and  
359 fixed with 4 % formaldehyde in phosphate buffered saline (PBS). Vigorous shaking in methanol led to  
360 the removal of the vitelline membrane. Finally, the methanol was replaced with 95% ethanol and the  
361 fixed embryos were stored at -20 °C.

362 We determined the developmental stage of the previously fixed embryos through staining with 4',6-  
363 diamidino-2-phenylindole (DAPI) (Carl Roth). After incubating the embryos in PBS with 0.5 µg/ml DAPI  
364 for five minutes, they were washed with PBS twice and mounted to a microscopy glass slide using  
365 Fluoroshield histology mounting medium (Sigma-Aldrich). A fluorescence inversion microscope  
366 (Observer Z1, Zeiss) with an attached fluorescence camera (AxioCamMR3, Zeiss) was used for taking  
367 pictures at 200x magnification. We ascertained embryonic development by assigning each picture to  
368 one of four categories. These categories were formed from a time line of naïve development over the

369 first ten hours after oviposition (cat.I=ca. 1h, cat.II=ca. 3h, cat.III=ca. 5h, cat.IV=ca. 8h), which was  
370 established prior to this experiment.

#### 371 4.7 Statistical analysis

372 If not stated otherwise, all statistical analyses were performed in R (R Development Core Team 2008,  
373 version 3.4.0) under RStudio version 0.99.467<sup>58</sup> using packages lme4<sup>59</sup> and MASS<sup>60</sup> when performing  
374 generalised linear mixed effects models (GLMMs). The correlation between fold coverage and  
375 proportion of unconverted cytosines was tested using a Spearman rank test.

376 All expression data of *Dnmt1* were analysed and tested for significant differences using the relative  
377 expression software tool REST2009 (Qiagen ; Pfaffl, Horgan, & Dempfle, 2002) as previously described  
378<sup>54</sup>. Bonferroni correction for multiple testing was applied to the results if the control group was  
379 compared to more than one treatment group.

380 For examining the eclosion and therefore survival after injection of the females in the knockdown  
381 experiments a GLMM with binomial error distribution was applied to the data. We investigated the  
382 effect of the knockdown on maternal fitness by testing hatching rates of larvae for differences in a  
383 GLMM with binomial error distribution followed by a Tukey's HSD test. Fecundity of individual pairs  
384 after maternal knockdown using both *Dnmt1* RNAi constructs was tested with a Kruskal-Wallis test,  
385 then pairwise comparisons were performed with a Wilcoxon test and p values were adjusted according  
386 to Benjamini & Hochberg (1995). Male fertility after knockdown was analysed with a generalised linear  
387 model (GLM) with negative binomial error distribution.

388 The embryonic development after maternal knockdown was tested with an ordinal logistic model  
389 (OLM) and a post-hoc maximum likelihood test to determine, whether the distribution of embryos to  
390 the four developmental categories was significantly different between the maternal treatments. This  
391 was done for each observed time point separately. Analyses were performed with JMP version 8 (SAS  
392 Institute Inc).



393 5 Data availability.

394 The datasets generated during and/or analysed during the current study are available from the  
395 corresponding author on reasonable request.

396 6 References

- 397 1. Beldade, P., Mateus, A. R. A. & Keller, R. A. Evolution and molecular mechanisms of adaptive  
398 developmental plasticity. *Mol. Ecol.* **20**, 1347–1363 (2011).
- 399 2. Roberts, S. B. & Gavery, M. R. Is there a relationship between DNA methylation and  
400 phenotypic plasticity in Invertebrates? *Front. Physiol.* **2**, 116 (2012).
- 401 3. Glastad, K. M., Hunt, B. G., Yi, S. V & Goodisman, M. a D. DNA methylation in insects: on the  
402 brink of the epigenomic era. *Insect Mol. Biol.* **20**, 553–65 (2011).
- 403 4. Elango, N., Hunt, B. G., Goodisman, M. a D. & Yi, S. V. DNA methylation is widespread and  
404 associated with differential gene expression in castes of the honeybee, *Apis mellifera*. *Proc.*  
405 *Natl. Acad. Sci. U. S. A.* **106**, 11206–11 (2009).
- 406 5. Lyko, F. *et al.* The honey bee epigenomes: differential methylation of brain DNA in queens and  
407 workers. *PLoS Biol.* **8**, e1000506 (2010).
- 408 6. Bonasio, R. *et al.* Genome-wide and Caste-Specific DNA Methylomes of the Ants *Camponotus*  
409 *floridanus* and *Harpegnathos saltator*. *Curr. Biol.* **22**, 1755–1764 (2012).
- 410 7. Kucharski, R., Maleszka, J., Foret, S. & Maleszka, R. Nutritional control of reproductive status  
411 in honeybees via DNA methylation. *Science (80-. )*. **319**, 1827–1830 (2008).
- 412 8. Lockett, G. a, Kucharski, R. & Maleszka, R. DNA methylation changes elicited by social stimuli  
413 in the brains of worker honey bees. *Genes. Brain. Behav.* **11**, 235–42 (2012).
- 414 9. Herb, B. R. *et al.* Reversible switching between epigenetic states in honeybee behavioral  
415 subcastes. *Nat. Neurosci.* **15**, 1371–3 (2012).
- 416 10. Wang, X. *et al.* The locust genome provides insight into swarm formation and long-distance  
417 flight. *Nat. Commun.* **5**, (2014).
- 418 11. Mallon, E. B., Amarasinghe, H. E. & Ott, S. R. Acute and chronic gregarisation are associated  
419 with distinct DNA methylation fingerprints in desert locusts. *Sci. Rep.* **6**, 35608 (2016).
- 420 12. Bongiorno, S., Cintio, O. & Prantera, G. The relationship between DNA methylation and  
421 chromosome imprinting in the Coccid *Planococcus citri*. *Genetics* **151**, 1471–1478 (1999).
- 422 13. Zwier, M. V., Verhulst, E. C., Zwahlen, R. D., Beukeboom, L. W. & Van De Zande, L. DNA  
423 methylation plays a crucial role during early *Nasonia* development. *Insect Mol. Biol.* **21**, 129–  
424 38 (2012).
- 425 14. Li-Byarlay, H. *et al.* RNA interference knockdown of DNA methyl-transferase 3 affects gene  
426 alternative splicing in the honey bee. *Proc. Natl. Acad. Sci. U. S. A.* **110**, 12750–5 (2013).
- 427 15. Bewick, A. J., Vogel, K. J., Moore, A. J. & Schmitz, R. J. Evolution of DNA Methylation across  
428 Insects. *Mol. Biol. Evol.* **34**, 654–665 (2017).
- 429 16. Provataris, P. *et al.* Signatures of DNA methylation across insects suggest reduced DNA  
430 methylation levels in Holometabola. *Genome Biol. Evol.* **10**, 1185–1197 (2018).
- 431 17. Mandrioli, M. & Volpi, N. The genome of the lepidopteran *Mamestra brassicae* has a  
432 vertebrate-like content of methyl-cytosine. *Genetica* **119**, 187–191 (2003).
- 433 18. Krauss, V., Eisenhardt, C. & Unger, T. The genome of the stick insect *Medauroidea*

- 434 *extradentata* is strongly methylated within genes and repetitive DNA. *PLoS One* **4**, e7223  
435 (2009).
- 436 19. Zemach, A., Mcdaniel, I. E., Silva, P. & Zilberman, D. Genome-wide evolutionary analysis of  
437 eukaryotic DNA methylation. *Science* **328**, 916–9 (2010).
- 438 20. Falckenhayn, C. *et al.* Characterization of genome methylation patterns in the desert locust  
439 *Schistocerca gregaria*. *J. Exp. Biol.* **216**, 1423–9 (2013).
- 440 21. Wang, X. *et al.* Function and Evolution of DNA Methylation in *Nasonia vitripennis*. *PLoS Genet.*  
441 **9**, (2013).
- 442 22. Werren, J. H. *et al.* Functional and Evolutionary Insights from the Genomes of Three Parasitoid  
443 *Nasonia* Species. *Science (80-. )*. **327**, 343–348 (2010).
- 444 23. Lyko, F. The DNA methyltransferase family: a versatile toolkit for epigenetic regulation. *Nat.*  
445 *Rev. Genet.* **19**, 81–92 (2018).
- 446 24. Goll, M. G. *et al.* Methylation of tRNA Asp by the DNA Methyltransferase Homolog *Dnmt2*.  
447 *Science* **311**, 395–398 (2006).
- 448 25. Schaefer, M. *et al.* RNA methylation by *Dnmt2* protects transfer RNAs against stress-induced  
449 cleavage. *Genes Dev.* **24**, 1590–1595 (2010).
- 450 26. Schaefer, M. & Lyko, F. Lack of evidence for DNA methylation of Invader4 retroelements in  
451 *Drosophila* and implications for Dnmt2-mediated epigenetic regulation. *Nat. Genet.* **42**, 920–  
452 1; author reply 921 (2010).
- 453 27. Raddatz, G. *et al.* Dnmt2-dependent methylomes lack defined DNA methylation patterns.  
454 *Proc. Natl. Acad. Sci. U. S. A.* **110**, 8627–31 (2013).
- 455 28. Lyko, F. & Maleszka, R. Insects as innovative models for functional studies of DNA  
456 methylation. *Trends Genet.* **27**, 127–31 (2011).
- 457 29. Richards, S. *et al.* The genome of the model beetle and pest *Tribolium castaneum*. *Nature* **452**,  
458 949–55 (2008).
- 459 30. Xiang, H. *et al.* Single base-resolution methylome of the silkworm reveals a sparse epigenomic  
460 map. *Nat. Biotechnol.* **28**, 516–20 (2010).
- 461 31. Standage, D. S. *et al.* Genome, transcriptome and methylome sequencing of a primitively  
462 eusocial wasp reveal a greatly reduced DNA methylation system in a social insect. *Mol. Ecol.*  
463 **25**, 1769–1784 (2016).
- 464 32. Bird, A. A. P. DNA methylation and the frequency of CpG in animal DNA. *Nucleic Acids Res.* **8**,  
465 999–1008 (1980).
- 466 33. Feliciello, I., Parazajder, J., Akrap, I. & Ugarković, Đ. First evidence of DNA methylation in  
467 insect *Tribolium castaneum*: Environmental regulation of DNA methylation within  
468 heterochromatin. *Epigenetics* **8**, 534–541 (2013).
- 469 34. Messerschmidt, D. M., Knowles, B. B. & Solter, D. DNA methylation dynamics during  
470 epigenetic reprogramming in the germline and preimplantation embryos. *Genes Dev.* **28**, 812–  
471 828 (2014).
- 472 35. Monk, D. Germline-derived DNA methylation and early embryo epigenetic reprogramming:  
473 The selected survival of imprints. *Int. J. Biochem. Cell Biol.* **67**, 128–138 (2015).
- 474 36. Song, X. *et al.* Genome-wide DNA methylomes from discrete developmental stages reveal the  
475 predominance of non-CpG methylation in *Tribolium castaneum*. *DNA Res.* **0**, 1–14 (2017).

- 476 37. Roth, O., Sadd, B. M., Schmid-Hempel, P. & Kurtz, J. Strain-specific priming of resistance in the  
477 red flour beetle, *Tribolium castaneum*. *Proc. R. Soc. B Biol. Sci.* **276**, 145–151 (2009).
- 478 38. Roth, O. *et al.* Paternally derived immune priming for offspring in the red flour beetle,  
479 *Tribolium castaneum*. *J. Anim. Ecol.* **79**, 403–413 (2010).
- 480 39. Tate, A. T., Andolfatto, P., Demuth, J. P. & Graham, A. L. The within-host dynamics of infection  
481 in trans-generationally primed flour beetles. *Mol. Ecol.* **26**, 3794–3807 (2017).
- 482 40. Kurtz, J. & Armitage, S. A. O. Dissecting the dynamics of trans-generational immune priming.  
483 *Mol. Ecol.* **26**, 3857–3859 (2017).
- 484 41. Vilcinskas, A. The role of epigenetics in host–parasite coevolution: lessons from the model  
485 host insects *Galleria mellonella* and *Tribolium castaneum*. *Zoology* **119**, 273–280 (2016).
- 486 42. Mukherjee, K. *et al.* Experimental evolution of resistance against *Bacillus thuringiensis* in the  
487 insect model host *Galleria mellonella* results in epigenetic modifications. *Virulence* **8**, 1618–  
488 1630 (2017).
- 489 43. Jurkowska, R. Z., Jurkowski, T. P. & Jeltsch, A. Structure and Function of Mammalian DNA  
490 Methyltransferases. *ChemBioChem* **12**, 206–222 (2011).
- 491 44. Xiang, H. *et al.* Comparative methylomics between domesticated and wild silkworms implies  
492 possible epigenetic influences on silkworm domestication. *BMC Genomics* **14**, 646 (2013).
- 493 45. Elango, N., Kim, S. H., Vigoda, E. & Yi, S. V. Mutations of different molecular origins exhibit  
494 contrasting patterns of regional substitution rate variation. *PLoS Comput. Biol.* **4**, (2008).
- 495 46. Zhang, J. *et al.* DNA methyltransferases have an essential role in female fecundity in brown  
496 planthopper, *Nilaparvata lugens*. *Biochem. Biophys. Res. Commun.* **464**, 83–88 (2015).
- 497 47. Espada, J. Non-catalytic functions of DNMT1. *Epigenetics* **7**, 115–118 (2012).
- 498 48. Espada, J. *et al.* Regulation of SNAIL1 and E-cadherin function by DNMT1 in a DNA  
499 methylation-independent context. *Nucleic Acids Res.* **39**, 9194–9205 (2011).
- 500 49. Qin, W., Leonhardt, H. & Pichler, G. Regulation of DNA methyltransferase 1 by interactions  
501 and modifications. *Nucleus* **2**, 392–402 (2011).
- 502 50. Clements, E. G. *et al.* DNMT1 modulates gene expression without its catalytic activity partially  
503 through its interactions with histone-modifying enzymes. *Nucleic Acids Res.* **40**, 4334–4346  
504 (2012).
- 505 51. Stancheva, I. & Meehan, R. R. Transient depletion of xDnmt1 leads to premature gene  
506 activation in *Xenopus* embryos. *Genes Dev.* **14**, 313–27 (2000).
- 507 52. Dunican, D. S., Ruzov, A., Hackett, J. a & Meehan, R. R. xDnmt1 regulates transcriptional  
508 silencing in pre-MBT *Xenopus* embryos independently of its catalytic function. *Development*  
509 **135**, 1295–1302 (2008).
- 510 53. Xi, Y. & Li, W. BSMAP: whole genome bisulfite sequence MAPPING program. *BMC*  
511 *Bioinformatics* **10**, 232 (2009).
- 512 54. Eggert, H., Kurtz, J. & Diddens-de Buhr, M. F. Different effects of paternal trans-generational  
513 immune priming on survival and immunity in step and genetic offspring. *Proc. R. Soc. B Biol.*  
514 *Sci.* **281**, 20142089 (2014).
- 515 55. Peuß, R. *et al.* Down syndrome cell adhesion molecule 1 : testing for a role in insect immunity,  
516 behaviour and reproduction. *R. Soc. Open Sci.* **3**, 160138 (2016).

- 517 56. Schmitt-Engel, C. *et al.* The iBeetle large-scale RNAi screen reveals gene functions for insect  
518 development and physiology. *Nat. Commun.* **6**, 7822 (2015).
- 519 57. R Development Core Team. R: A language and environment for statistical computing. (2008).
- 520 58. RStudio Team. R-Studio: integrated development for R. (2015).
- 521 59. Bates, D., Mächler, M., Bolker, B. & Walker, S. Fitting Linear Mixed-Effects Models Using lme4.  
522 *J. Stat. Softw.* **67**, 1–48 (2015).
- 523 60. Venables, W. N. & Ripley, B. D. *Modern Applied Statistics with S.* (Springer New York, 2002).  
524 doi:10.1007/978-0-387-21706-2
- 525 61. Pfaffl, M. W., Horgan, G. W. & Dempfle, L. Relative expression software tool (REST) for group-  
526 wise comparison and statistical analysis of relative expression results in real-time PCR. *Nucleic*  
527 *Acids Res.* **30**, e36 (2002).
- 528 62. Benjamini, Y. & Hochberg, Y. Controlling the False Discovery Rate: A Practical and Powerful  
529 Approach to Multiple Testing. *Journal of the Royal Statistical Society. Series B*  
530 *(Methodological)* **57**, 289–300 (1995).

531

#### 532 7 Acknowledgement

533 This work was supported in part by the Volkswagen Stiftung, project number I/84 794.

#### 534 8 Author contributions

535 Conceived and designed study: NS, IW, MDdB, FL, JK. Carried out lab work: NS, IW, JE. Carried out  
536 sequencing: GR. Analysed data: NS, GR. Wrote manuscript: NS with comments from all other authors.

#### 537 9 Competing Interest Statement

538 The authors declare no competing interests.

539 10 Tables

540 Table 1 Gene expression of *Dnmt1* normalised over the expression of two housekeeping genes.

|                                                | relative expression<br>of <i>Dnmt1</i> | 95% C. I.     | n  | p value          |
|------------------------------------------------|----------------------------------------|---------------|----|------------------|
| <b>Life stages (relative to adults)</b>        |                                        |               |    |                  |
| eggs                                           | <b>1.660</b>                           | 1.027 - 3.144 | 4  | <b>0.004</b>     |
| larvae                                         | 0.818                                  | 0.511 - 1.555 | 8  | 0.063            |
| pupae                                          | 0.794                                  | 0.390 - 1.784 | 8  | 0.176            |
| adults                                         | 1.000                                  | 0.535 - 1.878 | 8  | 0.997            |
| <b>Gonads (relative to whole-body samples)</b> |                                        |               |    |                  |
| male                                           | 1.382                                  | 1.008 - 1.828 | 4  | 0.056            |
| female                                         | <b>1.841</b>                           | 1.434 - 2.226 | 4  | <b>0.018</b>     |
| <b>RNAi (relative to treatment control)</b>    |                                        |               |    |                  |
| <b>Females</b>                                 |                                        |               |    |                  |
| <i>Dnmt1</i> construct a                       | <b>0.680</b>                           | 0.301 - 1.226 | 11 | <b>0.002</b>     |
| naïve                                          | 1.012                                  | 0.543 - 1.883 | 12 | 0.904            |
| <b>Eggs</b>                                    |                                        |               |    |                  |
| <i>Dnmt1</i> construct a                       | <b>0.442</b>                           | 0.226 - 0.753 | 3  | <b>0.025</b>     |
| naïve                                          | 1.062                                  | 0.458 - 2.062 | 3  | 0.869            |
| <b>Females</b>                                 |                                        |               |    |                  |
| <i>Dnmt1</i> construct a                       | <b>0.646</b>                           | 0.553 - 0.752 | 4  | <b>0.011</b>     |
| <i>Dnmt1</i> construct b                       | <b>0.703</b>                           | 0.536 - 0.906 | 4  | <b>0.021</b>     |
| naïve                                          | 1.007                                  | 0.865 - 1.199 | 4  | 0.856            |
| <b>Males</b>                                   |                                        |               |    |                  |
| <i>Dnmt1</i> construct a                       | <b>0.686</b>                           | 0.542 - 0.822 | 3  | <b>&lt;0.001</b> |
| naïve                                          | 1.062                                  | 0.853 - 1.312 | 3  | 0.458            |

541

542 11 Figures

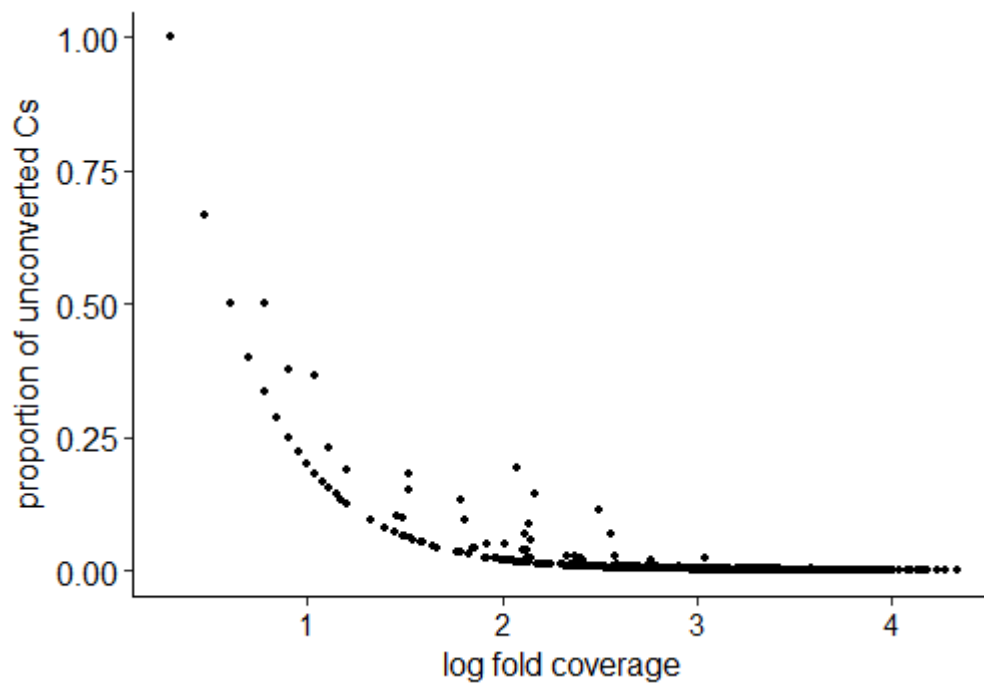

543

544 *Figure 1* Correlation between the proportion of unconverted cytosines that were observed in both replicates of the WGBS  
545 and the log fold coverage at each site (Spearman rank,  $\rho=-0.925$ ,  $n=1038$ ,  $p<0.001$ ).

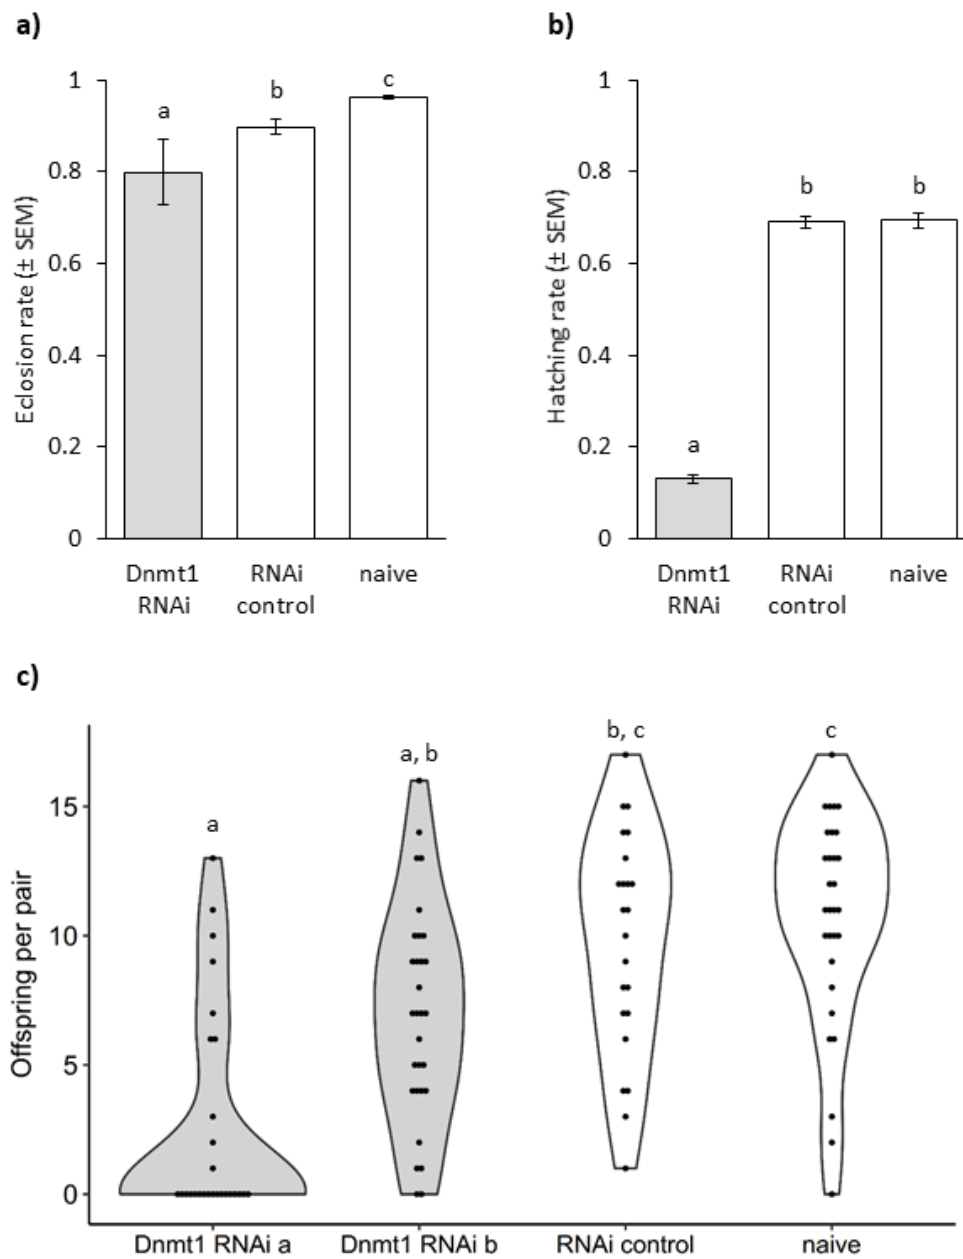

546

547 **Figure 2 Phenotypic effects of maternal RNAi** **a)** Eclosion and survival rate (± SEM) of female pupae after *Dnmt1* RNAi  
548 treatment. Three replicates with 240-270 individuals per treatment and block. **b)** Larval hatching rates (±SEM) after mothers  
549 received *Dnmt1* RNAi treatment. Three replicates with 100 individualized eggs per treatment and block. **c)** Offspring produced  
550 by single mating pairs (n=26-30) after maternal RNAi treatment (*Dnmt1* RNAi construct a or b, RNAi or naïve control). Letters  
551 indicate significant differences.

a)

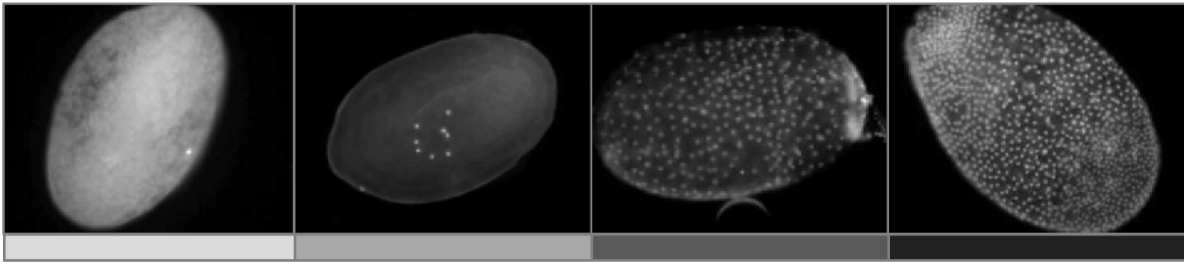

b)

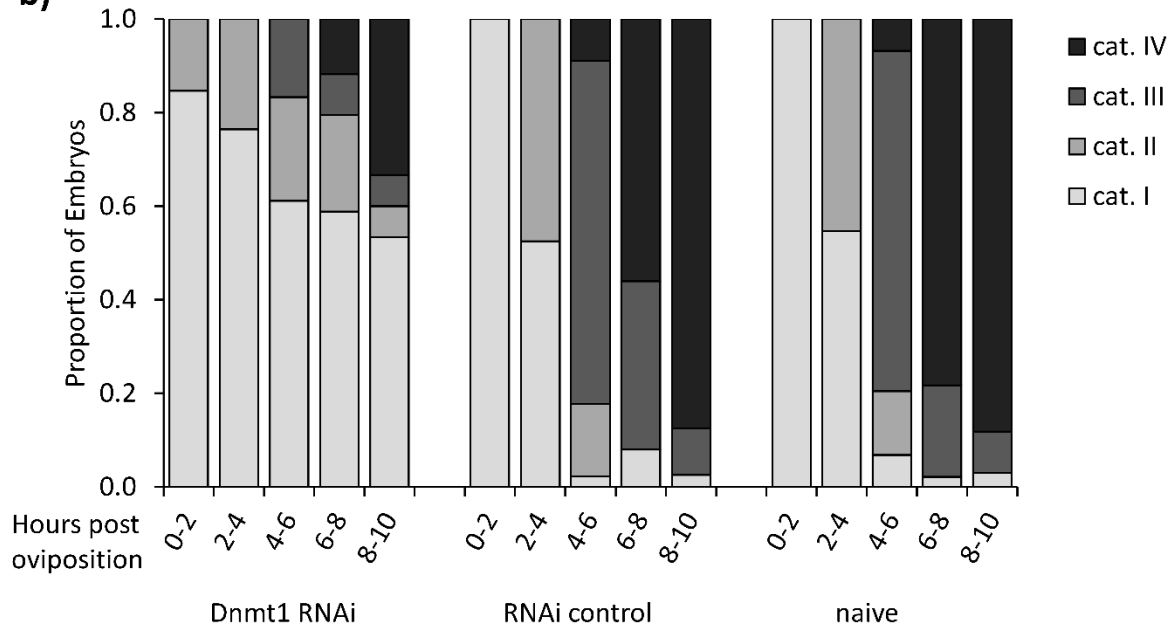

552

553 **Figure 3 *Dnmt1* knockdown and embryonic development** a) Timeline of naïve embryonic development. Shown is (left to  
 554 right) a representative example for each of the following age categories: cat. I (ca. 1h), cat. II (ca. 3h), cat. III (ca. 5h), cat. IV  
 555 (ca. 8h) after oviposition. Eggs were produced by untreated animals. b) Phenotypes of embryos after maternal RNAi. Eggs  
 556 from the treatment and controls (*Dnmt1* RNAi, RNAi control and naïve) and five age groups (hours post oviposition) were  
 557 sorted according to their developmental status into one of four categories established from the timeline of naïve  
 558 development.
